# Supplementary material for: Helicobacter pylori eradication improves motor fluctuations in advanced Parkinson’s disease patients: A prospective cohort study (HP-PD trial)
Source: PubMed Central journal article supplement (PMC8096108; doi:10.1371/journal.pone.0251042), 2021-05-04
Supplement: pone.0251042.s003.pdf [file pone.0251042.s003.pdf]

# แบบเสนอโครงการวิจัย

(ดัดแปลงจากแบบเสนอโครงการวิจัยเพื่อขอการรับรอง วันที่ 20 กันยายน พ.ศ.2561)

## ผลการกำจัดเชื้อเฮลิโคแบคเตอร์ ไพโลไร ต่อการตอบสนอง ต่อยาไม่สม่ำเสมอในผู้ป่วยพาร์กินสัน

### ชื่อหัวหน้าโครงการวิจัย

รองศาสตราจารย์ นายแพทย์ประวีณ โล่ห์เลขา

### ผู้วิจัยร่วม

นายแพทย์ธนาคาร ศรีพนม

ศาสตราจารย์ ดร. นายแพทย์รัฐกร วิไลชนม์

ภาควิชาอายุรศาสตร์ คณะแพทยศาสตร์ มหาวิทยาลัยธรรมศาสตร์

95 หมู่ 8 ถนน พหลโยธิน อำเภอคลองหลวง

จังหวัดปทุมธานี 12120 ประเทศไทย

## หลักการและเหตุผลที่ต้องทำวิจัย

โรคพาร์กินสันเป็นหนึ่งในโรคที่เกิดจากความเสื่อมทางระบบประสาทที่พบได้บ่อยในผู้สูงอายุ จากการศึกษาในประเทศไทยพบความชุกของโรคพาร์กินสันประมาณ 424.57 รายต่อประชากร 100,000 คน แม้ว่าในปัจจุบันจะมีการพัฒนาความรู้เกี่ยวกับการรักษาโรคพาร์กินสันเป็นอย่างมาก แต่ยาลีโวโดปา ยังจัดเป็นยาที่ได้ผลดีที่สุดในการบรรเทาอาการ ผู้ป่วยพาร์กินสันเกือบทุกรายจะต้องได้รับการรักษาด้วยยาลีโวโดปา เพื่อควบคุมอาการทางการเคลื่อนไหวและควบคุมคุณภาพชีวิต อย่างไรก็ตามการรักษาด้วยยาลีโวโดปาเป็นเวลานานในผู้ป่วยพาร์กินสันจะมีความสัมพันธ์กับการเกิดผลข้างเคียงทางการเคลื่อนไหวจากการรักษา ได้แก่ อาการตอบสนองต่อยาไม่สม่ำเสมอ และอาการยุกยิก ภายหลังจากการรักษาด้วยยาลีโวโดปาประมาณ 5 ปี ผู้ป่วยมากกว่าครึ่งหนึ่งจะเริ่มมีผลข้างเคียงดังกล่าวซึ่งส่งผลต่อการใช้ชีวิตประจำวันและคุณภาพชีวิต แม้ว่าโรคพาร์กินสันจะเป็นโรคที่ทำให้เกิดอาการทางการเคลื่อนไหวเป็นหลัก แต่เป็นที่ยอมรับกันว่าอาการที่นอกเหนือการเคลื่อนไหวก็สามารถพบร่วมได้มาก อาการทางระบบทางเดินอาหารเป็นอาการหนึ่งซึ่งเป็นปัญหาหลักในผู้ป่วยพาร์กินสันและอาจนำมาก่อนอาการทางการเคลื่อนไหวได้หลายปี จากหลักฐานในปัจจุบันเชื่อว่าการเปลี่ยนแปลงของแบคทีเรียขนาดเล็กในลำไส้และสมองมีส่วนในการเกิดพยาธิกำเนิดและการดำเนินโรคพาร์กินสัน นอกจากนี้ยังพบว่าผู้ป่วยที่มีอาการท้องผูกเรื้อรังหรือลำไส้อักเสบมีความเสี่ยงต่อการเกิดโรคพาร์กินสันที่เพิ่มขึ้น

เชื้อเฮลิโคแบคเตอร์ ไพโลไร หรือเอชพี เป็นแบคทีเรียชนิดแกรมลบที่เป็นสาเหตุทำให้เกิดการอักเสบในกระเพาะอาหารและลำไส้ ซึ่งมีความสัมพันธ์กับโรคทางระบบทางเดินอาหารหลายโรค เช่น โรคกระเพาะอาหาร โรคลำไส้อักเสบ และโรคมะเร็งกระเพาะอาหาร เป็นต้น ความชุกของการติดเชื้อเอชพีในประเทศไทยพบได้ประมาณ ร้อยละ 45.9 โดยเพศชายมีความเสี่ยงมากกว่าเพศหญิง อัตราการติดเชื้อในทุกช่วงอายุพบโดยเฉลี่ยประมาณร้อยละ 40-50 และมีอัตราการติดเชื้อสูงสุดที่ร้อยละ 49.3 ในกลุ่มประชากรวัยกลางคนหรืออายุประมาณ 40-49 ปี จากการศึกษาขนาดใหญ่พบว่าผู้ป่วยที่มีการติดเชื้อเอชพี เรื้อรังจะมีความเสี่ยงต่อการเกิดโรคพาร์กินสันที่เพิ่มขึ้น และยังพบความชุกของการติดเชื้อเอชพีในผู้ป่วยพาร์กินสันมากกว่าประชากรทั่วไป นอกจากนี้ผู้ป่วยพาร์กินสันที่มีการติดเชื้อเอชพีมักมีอาการทางการเคลื่อนไหวที่แย่กว่า เนื่องจากปัญหาทางระบบทางเดินอาหารอาจส่งผลต่อการดูดซึมและระดับยาลีโวโดปา ส่งผลให้เกิดการตอบสนองต่อยาที่ไม่สม่ำเสมอ ดังนั้นการกำจัดเชื้อเอชพีจึงน่าจะส่งผลในทางบวกแก่ผู้ป่วยพาร์กินสัน

## วัตถุประสงค์ของการวิจัย

### วัตถุประสงค์หลัก

- เพื่อศึกษาผลของการรักษาการติดเชื้อเอชพีต่อการตอบสนองต่อยาไม่สม่ำเสมอในผู้ป่วยพาร์กินสัน

### วัตถุประสงค์รอง

- เพื่อศึกษาผลของการรักษาการติดเชื้อเอชพีต่ออาการทางการเคลื่อนไหวในผู้ป่วยพาร์กินสัน
- เพื่อศึกษาผลของการรักษาการติดเชื้อเอชพีต่ออาการที่นอกเหนือการเคลื่อนไหวในผู้ป่วยพาร์กินสัน
- เพื่อศึกษาผลของการรักษาการติดเชื้อเอชพีต่อคุณภาพชีวิตของผู้ป่วยพาร์กินสัน

## ประเภทของโครงการวิจัย

เป็นการวิจัยทางคลินิกประเภทตามรุ่นตามแผนแบบไม่มีกลุ่มควบคุม

## อสาสมัคร

### การคำนวณขนาดตัวอย่าง

คำนวณขนาดตัวอย่างโดยอ้างอิงจากข้อมูลการศึกษาเดิมโดยใช้สูตรเพื่อหาความแตกต่างของค่าเฉลี่ยก่อนและหลังการรักษาโดยใช้สูตร โดยมีระดับความเชื่อมั่นที่ร้อยละ 80

$$n = \left[ \frac{(Z_{\alpha/2} + Z_{\beta})\sigma}{\Delta} \right]^2$$

ได้จำนวนผู้ป่วยที่มีการติดเชื้อเอชพี อย่างน้อย 15 ราย เมื่ออ้างอิงจากการศึกษาเดิมพบว่ามีผู้ป่วยพาร์กินสันที่ติดเชื้อเอชพี ประมาณร้อยละ 40 ดังนั้นต้องใช้ผู้ป่วยพาร์กินสันทั้งหมดประมาณ 40 ราย

ผู้ป่วยพาร์กินสันทุกรายที่เข้ารับการรักษาที่คลินิกประสาทวิทยา โรงพยาบาลธรรมศาสตร์ จะได้รับการประเมินและคัดกรองเพื่อเข้าร่วมงานวิจัย

### เกณฑ์การคัดเลือกผู้ร่วมวิจัย/อาสาสมัคร

- ผู้ป่วยพาร์กินสันที่ได้รับการวินิจฉัยตามเกณฑ์ของ UK Parkinson's Disease Society Brain Bank Diagnostic Criteria (UKPDSBB)
- อายุมากกว่าหรือเท่ากับ 18 ปี

- มีอาการตอบสนองต่อยาที่ไม่สม่ำเสมอ
- ได้รับการรักษาด้วยยาลิโวโดปา

#### เกณฑ์การคัดออกผู้ร่วมวิจัย/อาสาสมัคร

- ผู้ป่วยพาร์กินสันชนิดที่มีสาเหตุหรือผู้ป่วยพาร์กินสันเทียม
- ผู้ป่วยที่มีปัญหาสมองเสื่อม
- ผู้ป่วยพาร์กินสันที่มีภาวะทุพพลภาพมาก (Hoehn and Yahr scale 5)
- ผู้ป่วยที่มีปัญหาการกลืนลำบาก
- ผู้ป่วยที่มีประวัติของโรคกระเพาะอาหารหรือเคยได้รับการผ่าตัดกระเพาะอาหารมาก่อน
- ผู้ป่วยที่เคยได้รับการรักษาเชื้อเอชพีมาก่อน
- ผู้ป่วยที่มีประวัติแพ้ยากลุ่ม amoxicillin, clarithromycin และ omeprazole
- ผู้ป่วยตั้งครรภ์

#### กระบวนการวิจัยและกระบวนการเก็บข้อมูล

| การตรวจครั้งที่ | กระบวนการ                                                                                                                                                                                                                                                                                                                                                                                                                                                                                                                                          |
|-----------------|----------------------------------------------------------------------------------------------------------------------------------------------------------------------------------------------------------------------------------------------------------------------------------------------------------------------------------------------------------------------------------------------------------------------------------------------------------------------------------------------------------------------------------------------------|
| 1               | <ul style="list-style-type: none"> <li>- แจ้งวิธีการศึกษาวิจัย ผลดี ผลเสียที่อาจเกิดขึ้นได้ระหว่างการทำวิจัย</li> <li>- เซ็นใบยินยอมเข้าร่วมงานวิจัย</li> <li>- เก็บข้อมูลพื้นฐาน</li> <li>- ผู้ป่วยจะได้รับการสอนการทำตารางปฏิทินสำหรับผู้ป่วยพาร์กินสัน โดยผู้ป่วยจะต้องทำปฏิทินอย่างน้อย 3 วันก่อนเข้ามาเพื่อการตรวจครั้งที่ 1</li> <li>- ผู้ป่วยที่รับประทานยาปฏิชีวนะอยู่จะต้องหยุดยาอย่างน้อย 4 สัปดาห์</li> <li>- ผู้ป่วยที่รับประทานยาลดกรดจะต้องหยุดยาอย่างน้อย 2 สัปดาห์</li> <li>- ทำการนัดหมายเพื่อเข้ารับการตรวจครั้งที่ 2</li> </ul> |
| 2               | <ul style="list-style-type: none"> <li>- งดน้ำงดอาหารและยาที่ใช้ในการรักษาพาร์กินสันอย่างน้อย 8 ชั่วโมงเพื่อเข้ารับการประเมินในตอนเช้า</li> <li>- ประเมินอาการทางการเคลื่อนไหว UPDRS และ time up and go ในขณะที่ออฟ</li> <li>- ทดสอบการติดเชื้อเอชพี โดย <sup>13</sup>C-urea breath test (UBT) ใช้เวลาประมาณ 30 นาที</li> </ul>                                                                                                                                                                                                                    |

|                               |                                                                                                                                                                                                                                                                                                                                                                                                                                                                                                                                                                                                                                                                                                                                                                                                                                                                                                          |
|-------------------------------|----------------------------------------------------------------------------------------------------------------------------------------------------------------------------------------------------------------------------------------------------------------------------------------------------------------------------------------------------------------------------------------------------------------------------------------------------------------------------------------------------------------------------------------------------------------------------------------------------------------------------------------------------------------------------------------------------------------------------------------------------------------------------------------------------------------------------------------------------------------------------------------------------------|
|                               | <ul style="list-style-type: none"> <li>- รับประทานยาสิโวโดปาขนาดปกติที่ผู้ป่วยรับประทานในมือเข้าพร้อมกับน้ำเปล่า</li> <li>- ประเมินระยะเวลาที่ยาสิโวโดปาเริ่มออกฤทธิ์ และออกฤทธิ์สูงสุด</li> <li>- ประเมินอาการทางการเคลื่อนไหว UPDRS และ time up and go ในขณะที่นอน (ในขณะที่ผู้ป่วยรู้สึกว่ายากออกฤทธิ์สูงสุด หรือ 90 นาทีหลังรับประทานยา)</li> <li>- ประเมินอาการที่นอกเหนือจากการเคลื่อนไหว</li> <li>- ประเมินอาการทางระบบทางเดินอาหาร</li> <li>- ประเมินอาการแวมริงออฟ ด้วยแบบสอบถามภาษาไทย</li> <li>- ประเมินคุณภาพชีวิตของผู้ป่วยพาร์กินสันด้วย ฟิดีคิว-8</li> <li>- ผู้ป่วยที่ได้ผลบวกจากการตรวจ UBT จะได้รับการรักษาเพิ่มเติมด้วยยา amoxicillin (1 mg twice daily), clarithromycin (500 mg twice daily) และ omeprazole (40 mg twice daily) นาน 2 สัปดาห์</li> <li>- ทำการนัดหมายเพื่อเข้ารับการประเมินที่ 6 สัปดาห์</li> <li>- ผู้ตรวจและทำการประเมินไม่ทราบผลการตรวจเอชพีของผู้ป่วย</li> </ul> |
| <p><b>3 (≥ 6 สัปดาห์)</b></p> | <ul style="list-style-type: none"> <li>- นัดเพื่อเข้ารับการประเมินเช่นเดียวกับการประเมินครั้งที่ 2</li> <li>- ทดสอบการติดเชื้อเอชพี โดย <sup>13</sup>C-urea breath test (UBT) เพื่อประเมินการรักษาหาย</li> <li>- ประเมินผลการรักษาโดยรวม</li> <li>- ผู้ตรวจและทำการประเมินไม่ทราบผลการตรวจเอชพีของผู้ป่วย</li> </ul>                                                                                                                                                                                                                                                                                                                                                                                                                                                                                                                                                                                     |

## การวัดผล

### การวัดผลของวัตถุประสงค์หลัง

- การเปลี่ยนแปลงของระยะเวลา “นอน” และ “ออฟ” ภายหลังจากการรักษา
- การเปลี่ยนแปลงของระยะเวลาเริ่มออกฤทธิ์และออกฤทธิ์สูงสุดของยาสิโวโดปา
- การเปลี่ยนแปลงของอาการแวมริงออฟ

### การวัดผลของวัตถุประสงค์รอง

- การเปลี่ยนแปลงของคะแนนการเคลื่อนไหว UPDRS
- การเปลี่ยนแปลงของคะแนนอาการที่นอกเหนือจากการเคลื่อนไหวและอาการในระบบทางเดินอาหาร

- การเปลี่ยนแปลงของระดับคุณภาพชีวิต

### การวิเคราะห์ผลทางสถิติ

- วิเคราะห์ข้อมูลโดยใช้โปรแกรม SPSS เวอร์ชันที่ 17.0
- ข้อมูลเชิงพรรณานำเสนอโดยค่าเฉลี่ย ค่าเบี่ยงเบนมาตรฐานและร้อยละ
- ข้อมูลเปรียบเทียบความแตกต่างของค่ากลางระหว่างกลุ่มที่มีอาชีพเป็นบวกและลบ ใช้สถิติ Mann-Whitney test หรือ independent t-test และ chi-square ตามความเหมาะสมของชนิดข้อมูล
- ข้อมูลเปรียบเทียบความแตกต่างของค่ากลางระหว่างก่อนและหลังการรักษาอาชีพ ใช้สถิติ Wilcoxon paired rank-sum test หรือ dependent t-test ตามความเหมาะสม
- ข้อมูลการศึกษาความสัมพันธ์ใช้วิธี correlational analysis
- การทดสอบสมมติฐานใช้การทดสอบแบบสองทาง โดย  $p < 0.05$  ถือว่ามีนัยสำคัญทางสถิติ

### ทุนวิจัย

การศึกษานี้ได้รับทุนวิจัยทั่วไปจากมหาวิทยาลัยธรรมศาสตร์และทุนสนับสนุนวิจัยบางส่วนจากชมรมพาร์กินสัน ประเทศไทย

## โครงการวิจัย

|                  |                                                                                                                                                                                                                                                                                                                                                               |
|------------------|---------------------------------------------------------------------------------------------------------------------------------------------------------------------------------------------------------------------------------------------------------------------------------------------------------------------------------------------------------------|
| ชื่อเรื่อง       | ผลกรรทำจัดเชื้อเฮลิโคแบคเตอร์ ไพโลไร ต่อการตอบสนองต่อยาไม่สม่าเสมอในผู้ป่วยพาร์กินสัน                                                                                                                                                                                                                                                                         |
| ผู้รับผิดชอบ     | รศ.นพ. ประวิณ โฉ่เลขา<br>นพ. ธนาคาร ศรีพนม<br>ศ.นพ.รัฐกร วิไลชนม์                                                                                                                                                                                                                                                                                             |
| วัตถุประสงค์หลัก | เพื่อศึกษาผลของการรักษาการติดเชื้อเอชพีต่อการตอบสนองต่อยาไม่สม่าเสมอในผู้ป่วยพาร์กินสัน                                                                                                                                                                                                                                                                       |
| วัตถุประสงค์รอง  | เพื่อศึกษาผลของการรักษาการติดเชื้อเอชพีต่ออาการทางการเคลื่อนไหว อาการที่นอกเหนือจากการเคลื่อนไหว และคุณภาพชีวิตของผู้ป่วยพาร์กินสันที่มีการตอบสนองต่อยาไม่สม่าเสมอ                                                                                                                                                                                            |
| รูปแบบการศึกษา   | การวิจัยทางคลินิกประเภทตามรุ่นตามแผนแบบไม่มีกลุ่มควบคุม                                                                                                                                                                                                                                                                                                       |
| อาสาสมัคร        | ผู้ป่วยพาร์กินสันที่มีการตอบสนองต่อยาไม่สม่าเสมอจำนวน 40 ราย                                                                                                                                                                                                                                                                                                  |
| การรักษา         | การกำจัดเชื้อเอชพี ด้วยยาสามชนิด ขนาดมาตรฐานเป็นเป็นเวลา 2 สัปดาห์ (ยาอะม็อกซิซิลลิน ขนาด 1 กรัม วันละ 2 ครั้ง ยาคลาริโทรมัยซิน ขนาด 500 มิลลิกรัม วันละ 2 ครั้ง และยาโอเมพราโซล ขนาด 40 มิลลิกรัม วันละ 2 ครั้ง)                                                                                                                                             |
| กระบวนการวิจัย   | 1 เก็บข้อมูลพื้นฐาน ให้คำยินยอม และอธิบายกระบวนการวิจัย<br>2 ประเมินอาการครั้งที่ 1<br>3 ประเมินอาการครั้งที่ 2 ห่างจากครั้งแรกอย่างน้อย 6 สัปดาห์                                                                                                                                                                                                            |
| การวัดผล         | การประเมิน $^{13}\text{C}$ -urea breath test (UBT)<br>ระยะเวลา “ออน” และ “ออฟ”<br>ระยะเวลาเริ่มออกฤทธิ์และออกฤทธิ์สูงสุดของยาลีโวโดปา<br>แบบสอบถามแวงริงออฟภาษาไทย<br>ประเมินอาการทางการเคลื่อนไหว<br>ประเมินการเดินและเวลาที่ใช้ในการเดิน<br>ประเมินอาการที่นอกเหนือจากการเคลื่อนไหว<br>ประเมินอาการทางระบบทางเดินอาหาร<br>ประเมินระดับคุณภาพชีวิตของผู้ป่วย |

วันที่.....

## แบบเก็บข้อมูลผู้ป่วยโรคพาร์กินสัน รพ. ธรรมศาสตร์เฉลิมพระเกียรติ

### 1-1 ข้อมูลทั่วไป

1.1 .....

1.2 อายุ.....ปี

1.3 เพศ  ชาย  หญิง

1.4 ค่ารักษาพยาบาลเบิกได้หรือไม่  ราชการ  บัตรทอง  ประกันสังคม  จ่ายเอง

1.5 ประวัติโรคพาร์กินสันในครอบครัว  ไม่มี  มี.....

1.6 ระดับการศึกษา .....

### 1-2. Schwab & England ADL scale

|                        |                                                                                                                                                                                                                                     |
|------------------------|-------------------------------------------------------------------------------------------------------------------------------------------------------------------------------------------------------------------------------------|
| Completely independent | <input type="checkbox"/> 100% Normal<br><input type="checkbox"/> 90% Some slowness<br><input type="checkbox"/> 80 % Takes twice as long, conscious of difficulty and slow<br><input type="checkbox"/> 70% 3-4 times as long in some |
| Some dependency        | <input type="checkbox"/> 60 % Can do most chores, but slow and much effort. Error                                                                                                                                                   |
| More dependent         | <input type="checkbox"/> 50% Slower, difficulty in everything                                                                                                                                                                       |
| Very dependent         | <input type="checkbox"/> 40 % Can assist with all chores but few alone<br><input type="checkbox"/> 30 % Dose a few chores alone or begins alone, need help<br><input type="checkbox"/> 20 % Nothing alone                           |
| Totally dependent      | <input type="checkbox"/> 10 %                                                                                                                                                                                                       |
| Vegetative, Bedridden  | <input type="checkbox"/> 0 %                                                                                                                                                                                                        |

### 1-3. ข้อมูลการรักษาโรคพาร์กินสัน

อายุที่เริ่มมีอาการของโรคพาร์กินสัน.....ปี

ระยะเวลาที่มีอาการของโรคพาร์กินสัน.....ปี

อาการของโรคพาร์กินสัน  tremor dominant  PIGD  Unidentified

ขอขอบคุณที่ท่านช่วยตอบแบบสอบถามจนเสร็จสมบูรณ์



วันที่.....

| ยาที่รับประทาน      | ขนาดที่รับประทานต่อวัน | Conversion factor | Levodopa equivalent dose |
|---------------------|------------------------|-------------------|--------------------------|
| Levodopa (IR)       |                        | x 1               |                          |
| Levodopa (HBS)      |                        | x 0.75            |                          |
| Entacapone/ Stalevo |                        | LD x 0.33         |                          |
| Pramipexole         |                        | x 100             |                          |
| Ropinirole          |                        | x 20              |                          |
| Rotigotine          |                        | x 30              |                          |
| Peribidil           |                        | x 1               |                          |
| Bromocriptine       |                        | x 10              |                          |
| Rasagiline          |                        | x 100             |                          |
| Apomorphine         |                        | x 10              |                          |
| Others              |                        |                   |                          |

Antidementia  Donepezil  Rivastigmine  Galantamine  Memantine

Antidepressant  .....

Antipsychotic  Haloperidol  Risperdal  Quetiapine  Others.....

Anxiolytics  Clonazepam  Lorazepam  Alprazolam  Sleep medication

Others  Anticholinergics

Anti-Acid  ..... หยุด 2 สัปดาห์

Anti-biotics  ..... หยุด 4 สัปดาห์

#### 1-4. Motor complication

4.1 Predictable wearing off  Yes  No EOD score .....

4.2 Unpredictable On/Off  Yes  No

**ขอขอบคุณที่ท่านช่วยตอบแบบสอบถามจนเสร็จสมบูรณ์**

วันที่.....

4.3 Dose failure  Yes  No

4.4 Peak dose dyskinesia  Yes  No

4.5 Biphasic dyskinesia  Yes  No

4.6 Off dystonia  Yes  No

4.7 Morning akinesia  Yes  No

1-5 PDQ8, 1-6 GI complain score, 1-7 NMSQ แยกเก็บ

---

ครั้งที่ 2 ทดสอบ UBT

---

3-1. PD diary ครั้งที่ 1 On.....% Off.....% Dyskinesia .....%

3-2. ผลการทดสอบ UBT  Positive  Negative

3-3. Off UPDRS motor score .....

3-4. Onset time of levodopa action ..... นาที

3-5. On UPDRS motor score .....

3-6. Time up and go test ..... นาที

ให้การรักษาในกลุ่ม UBT +ve

---

4-1. PD diary ครั้งที่ 2 On.....% Off.....% Dyskinesia .....%

4.2 Side effect of therapy  Yes .....  No

4-3. Off UPDRS motor score .....

4-4. Onset time of levodopa action ..... นาที

4-5. On UPDRS motor score .....

**ขอขอบคุณที่ท่านช่วยตอบแบบสอบถามจนเสร็จสมบูรณ์**

วันที่.....

4-6. Time up and go test ..... นาที

---

Motor complication

4.1 Predictable wearing off  Yes  No EOD score .....

4.2 Unpredictable On/Off  Yes  No

4.3 Dose failure  Yes  No

4.4 Peak dose dyskinesia  Yes  No

4.5 Biphasic dyskinesia  Yes  No

4.6 Off dystonia  Yes  No

4.7 Morning akinesia  Yes  No

1-5 PDQ8, 1-6 GI complain score, 1-7 NMSQ แยกเก็บ

---

4-8. ผลการทดสอบ UBT-post  Positive  Negative

**ขอขอบคุณที่ท่านช่วยตอบแบบสอบถามจนเสร็จสมบูรณ์**

วันที่.....

## แบบสอบถามอาการทางระบบทางเดินอาหาร

ในช่วง 1 สัปดาห์ที่ผ่านมาท่านมีอาการเหล่านี้หรือไม่เพียงใด

|                         | ไม่มีอาการ                                                                           | มีอาการปานกลาง | มีอาการมาก |
|-------------------------|--------------------------------------------------------------------------------------|----------------|------------|
| 1. อาการแสบร้อนกลางอก   |    |                |            |
| 2. อาการท้องอืดท้องเฟ้อ |    |                |            |
| 3. อาการคลื่นไส้        |    |                |            |
| 4. อาการอาเจียน         |  |                |            |
| 5. อาการปวดท้อง         |  |                |            |
| 6. อาการท้องเสีย        |  |                |            |
| 7. อาการท้องผูก         |  |                |            |

ขอขอบคุณที่ท่านช่วยตอบแบบสอบถามจนเสร็จสมบูรณ์

แบบประเมินอาการช่วงยาหมดฤทธิ์ “แวมิ่ง ออฟ” หรืออาการต่างๆที่กำเริบของโรคพาร์กินสัน  
ก่อนที่จะรับประทานยามื้อต่อไป “เอน ออฟ โดส”

Thai version of the 9-item Wearing-off Questionnaire (TWOQ-9)  
End-of-dose Questionnaire (EOD)

แบบประเมินที่ใช้คัดกรองอาการยาหมดฤทธิ์ (wearing - off) ทั้งอาการที่เกี่ยวข้องกับการเคลื่อนไหว (motor symptoms) และอาการที่ไม่เกี่ยวข้องกับการเคลื่อนไหว (non - motor symptoms) โดยให้เลือกอาการที่เกิดขึ้น ในช่วงที่ยาหมดฤทธิ์ และอาการอื่นๆ จะต้องดีขึ้นเมื่อยาออกฤทธิ์ จึงจะเข้าเกณฑ์การวินิจฉัย wearing-off จากการศึกษาแบบ multicenter, cross-sectional พบว่า WOQ-9 มี sensitivity 96.2% และ specificity 40.9%

กรุณาลงเครื่องหมาย ✓ ในช่อง เพื่อเลือกอาการช่วงที่ยาหมดฤทธิ์ “แวมิ่ง ออฟ” ใดๆ ที่เกิดขึ้นในระหว่างวันของท่าน ถ้าท่านมีอาการช่วงยาหมดฤทธิ์ “แวมิ่ง ออฟ” มากกว่า 2 อาการ ท่านสามารถเลือกได้ตามอาการที่เกิดขึ้น และลงเครื่องหมาย ✓ ในช่อง อีกครั้ง หากอาการดังกล่าวดีขึ้นหลังรับประทานยามื้อถัดไป

| อาการช่วงที่ยาหมดฤทธิ์<br>“แวมิ่ง ออฟ” | มีอาการ | อาการดีขึ้นหลังรับประทานยา |
|----------------------------------------|---------|----------------------------|
| สั่น                                   |         |                            |
| กระวนกระวาย                            |         |                            |
| อารมณ์เปลี่ยนแปลง                      |         |                            |
| เคลื่อนไหวช้า                          |         |                            |
| ใช้มือไม่คล่อง                         |         |                            |
| เกร็งทั่วไป                            |         |                            |
| คิดอะไรไม่ออก                          |         |                            |
| กล้ามเนื้อเกร็ง                        |         |                            |
| ปวดเมื่อย                              |         |                            |

- ดัดแปลงจาก Thai Parkinson's disease and movement disorder

## แบบบันทึกอาการผู้ป่วยพาร์กินสัน โรงพยาบาลธรรมศาสตร์เฉลิมพระเกียรติ

ชื่อ-นามสกุล ..... วันที่ .....

|    | เวลา        | รับประทาน<br>ยาลีโวโดปา<br><br> | อาการ ออฟ (ไม่ดี)<br>ลำตัวแข็งเกร็ง<br><u>เคลื่อนไหวลำบาก</u><br>หรือ <u>สั่นมาก</u> | อาการ ออน (ดี)<br><u>เคลื่อนไหวได้เป็น</u><br><u>ปรกติ</u> ไกล่เคียงปรกติ<br>สบายตัว | อาการยุกยิก<br><u>เคลื่อนไหวได้แต่</u><br><u>มีอาการส่าย/โยก</u><br>ไปมาที่ลำตัว ไบหน้า | นอนหลับ |
|----|-------------|------------------------------------------------------------------------------------------------------------------|--------------------------------------------------------------------------------------|--------------------------------------------------------------------------------------|-----------------------------------------------------------------------------------------|---------|
| 1  | 6.00 - 6.29 |                                                                                                                  |                                                                                      |                                                                                      |                                                                                         |         |
| 2  | 6.30 - 6.59 |                                                                                                                  |                                                                                      |                                                                                      |                                                                                         |         |
| 3  | 7.00 - 7.29 |                                                                                                                  |                                                                                      |                                                                                      |                                                                                         |         |
| 4  | 7.30 - 7.59 |                                                                                                                  |                                                                                      |                                                                                      |                                                                                         |         |
| 5  | 8.00 - 8.29 |                                                                                                                  |                                                                                      |                                                                                      |                                                                                         |         |
| 6  | 8.30 - 8.59 |                                                                                                                  |                                                                                      |                                                                                      |                                                                                         |         |
| 7  | 9.00 - 9.29 |                                                                                                                  |                                                                                      |                                                                                      |                                                                                         |         |
| 8  | 9.30 - 9.59 |                                                                                                                  |                                                                                      |                                                                                      |                                                                                         |         |
| 9  | 10.00-10.29 |                                                                                                                  |                                                                                      |                                                                                      |                                                                                         |         |
| 10 | 10.30-10.59 |                                                                                                                  |                                                                                      |                                                                                      |                                                                                         |         |
| 11 | 11.00-11.29 |                                                                                                                  |                                                                                      |                                                                                      |                                                                                         |         |
| 12 | 11.30-11.59 |                                                                                                                  |                                                                                      |                                                                                      |                                                                                         |         |
| 13 | 12.00-12.29 |                                                                                                                  |                                                                                      |                                                                                      |                                                                                         |         |
| 14 | 12.30-12.59 |                                                                                                                  |                                                                                      |                                                                                      |                                                                                         |         |
| 15 | 13.00-13.29 |                                                                                                                  |                                                                                      |                                                                                      |                                                                                         |         |
| 16 | 13.30-13.59 |                                                                                                                  |                                                                                      |                                                                                      |                                                                                         |         |
| 17 | 14.00-14.29 |                                                                                                                  |                                                                                      |                                                                                      |                                                                                         |         |
| 18 | 14.30-14.59 |                                                                                                                  |                                                                                      |                                                                                      |                                                                                         |         |
| 19 | 15.00-15.29 |                                                                                                                  |                                                                                      |                                                                                      |                                                                                         |         |
| 20 | 15.30-15.59 |                                                                                                                  |                                                                                      |                                                                                      |                                                                                         |         |
| 21 | 16.00-16.29 |                                                                                                                  |                                                                                      |                                                                                      |                                                                                         |         |
| 22 | 16.30-16.59 |                                                                                                                  |                                                                                      |                                                                                      |                                                                                         |         |
| 23 | 17.00-17.29 |                                                                                                                  |                                                                                      |                                                                                      |                                                                                         |         |
| 24 | 17.30-17.59 |                                                                                                                  |                                                                                      |                                                                                      |                                                                                         |         |
| 25 | 18.00-18.29 |                                                                                                                  |                                                                                      |                                                                                      |                                                                                         |         |
| 26 | 18.30-18.59 |                                                                                                                  |                                                                                      |                                                                                      |                                                                                         |         |
| 27 | 19.00-19.29 |                                                                                                                  |                                                                                      |                                                                                      |                                                                                         |         |
| 28 | 19.30-19.59 |                                                                                                                  |                                                                                      |                                                                                      |                                                                                         |         |
| 29 | 20.00-20.29 |                                                                                                                  |                                                                                      |                                                                                      |                                                                                         |         |
| 30 | 20.30-20.59 |                                                                                                                  |                                                                                      |                                                                                      |                                                                                         |         |
| 31 | 21.00-21.29 |                                                                                                                  |                                                                                      |                                                                                      |                                                                                         |         |
| 32 | 21.30-21.59 |                                                                                                                  |                                                                                      |                                                                                      |                                                                                         |         |
| 33 | 22.00-22.29 |                                                                                                                  |                                                                                      |                                                                                      |                                                                                         |         |
| 34 | 22.30-22.59 |                                                                                                                  |                                                                                      |                                                                                      |                                                                                         |         |
| 35 | 23.00-23.29 |                                                                                                                  |                                                                                      |                                                                                      |                                                                                         |         |

สำหรับแพทย์

|  |  |  |  |  |  |  |
|--|--|--|--|--|--|--|
|  |  |  |  |  |  |  |
|--|--|--|--|--|--|--|

แบบเก็บข้อมูล UPDRS III. Motor Exam รพ. ธรรมศาสตร์เฉลิมพระเกียรติ

.....  
 Date/ time.....  
 DOB & Age .....

Last Meds taken .....

Wearing off / off symptom

Dyskinesias

Upper  Lower  Generalized

|                                                                                                                                                                                                                                                                                                                                                             |                                                                                                                                                                                                                                                                                                                                                                                                                                                                                                                                                                                                                     |   |   |   |   |  |  |
|-------------------------------------------------------------------------------------------------------------------------------------------------------------------------------------------------------------------------------------------------------------------------------------------------------------------------------------------------------------|---------------------------------------------------------------------------------------------------------------------------------------------------------------------------------------------------------------------------------------------------------------------------------------------------------------------------------------------------------------------------------------------------------------------------------------------------------------------------------------------------------------------------------------------------------------------------------------------------------------------|---|---|---|---|--|--|
| <p><b>Speech</b></p> <p>0 = Normal.</p> <p>1 = Slight loss of expression, diction and/or volume.</p> <p>2 = Monotone, slurred but understandable; moderately impaired.</p> <p>3 = Marked impairment, difficult to understand.</p> <p>4 = Unintelligible.</p>                                                                                                | <p><b>Rigidity</b></p> <p>0 = Absent.</p> <p>1 = Slight or detectable only when activated by mirror or other movements.</p> <p>2 = Mild to moderate.</p> <p>3 = Marked, but full range of motion easily achieved.</p> <p>4 = Severe, range of motion achieved with difficulty.</p> <table border="1" style="float: right; margin-top: 10px;"> <tr><td colspan="2" style="text-align: center;">H</td></tr> <tr><td style="text-align: center;">R</td><td style="text-align: center;">L</td></tr> <tr><td> </td><td> </td></tr> </table>                                                                              | H |   | R | L |  |  |
| H                                                                                                                                                                                                                                                                                                                                                           |                                                                                                                                                                                                                                                                                                                                                                                                                                                                                                                                                                                                                     |   |   |   |   |  |  |
| R                                                                                                                                                                                                                                                                                                                                                           | L                                                                                                                                                                                                                                                                                                                                                                                                                                                                                                                                                                                                                   |   |   |   |   |  |  |
|                                                                                                                                                                                                                                                                                                                                                             |                                                                                                                                                                                                                                                                                                                                                                                                                                                                                                                                                                                                                     |   |   |   |   |  |  |
| <p><b>Facial Expression</b></p> <p>0 = Normal.</p> <p>1 = Minimal hypomimia, could be "Poker Face".</p> <p>2 = Slight but definitely abnormal diminution of facial expression.</p> <p>3 = Moderate hypomimia; lips parted some time.</p> <p>4 = Masked or fixed facies with severe or complete loss of facial expression; lips parted 1/4 inch or more.</p> | <p><b>Finger Taps</b></p> <p>0 = Normal.</p> <p>1 = Mild slowing and/or reduction in amplitude.</p> <p>2 = Moderately impaired. Definite and early fatiguing. May have occasional arrests in movement.</p> <p>3 = Severely impaired. Frequent hesitation in initiating movements or arrests in ongoing movement.</p> <p>4 = Can barely perform the task.</p> <table border="1" style="float: right; margin-top: 10px;"> <tr><td style="text-align: center;">R</td><td style="text-align: center;">L</td></tr> </table>                                                                                              | R | L |   |   |  |  |
| R                                                                                                                                                                                                                                                                                                                                                           | L                                                                                                                                                                                                                                                                                                                                                                                                                                                                                                                                                                                                                   |   |   |   |   |  |  |
| <p><b>Tremor at rest</b></p> <p>0 = Absent.</p> <p>1 = Slight and infrequently present.</p> <p>2 = Mild in amplitude and persistent. Or moderate in amplitude, but only intermittently present.</p> <p>3 = Moderate in amplitude and present most of the time.</p> <p>4 = Marked in amplitude and present most of the time.</p>                             | <p><b>Hand Movements</b></p> <p>0 = Normal.</p> <p>1 = Mild slowing and/or reduction in amplitude.</p> <p>2 = Moderately impaired. Definite and early fatiguing. May have occasional arrests in movement.</p> <p>3 = Severely impaired. Frequent hesitation in initiating movements or arrests in ongoing movement.</p> <p>4 = Can barely perform the task.</p> <table border="1" style="float: right; margin-top: 10px;"> <tr><td colspan="2" style="text-align: center;">H</td></tr> <tr><td style="text-align: center;">R</td><td style="text-align: center;">L</td></tr> <tr><td> </td><td> </td></tr> </table> | H |   | R | L |  |  |
| H                                                                                                                                                                                                                                                                                                                                                           |                                                                                                                                                                                                                                                                                                                                                                                                                                                                                                                                                                                                                     |   |   |   |   |  |  |
| R                                                                                                                                                                                                                                                                                                                                                           | L                                                                                                                                                                                                                                                                                                                                                                                                                                                                                                                                                                                                                   |   |   |   |   |  |  |
|                                                                                                                                                                                                                                                                                                                                                             |                                                                                                                                                                                                                                                                                                                                                                                                                                                                                                                                                                                                                     |   |   |   |   |  |  |
| <p><b>Action/Postural Tremor of hands</b></p> <p>0 = Absent.</p> <p>1 = Slight; present with action.</p> <p>2 = Moderate in amplitude, present with action.</p> <p>3 = Moderate in amplitude with posture as well as action.</p> <p>4 = Marked in amplitude; interferes with feeding.</p>                                                                   | <p><b>Rapid Alternating Movements of Hands</b></p> <p>0 = Normal.</p> <p>1 = Mild slowing and/or reduction in amplitude.</p> <p>2 = Moderately impaired. Definite and early fatiguing. May have occasional arrests in movement.</p> <p>3 = Severely impaired. Frequent hesitation in initiating movements or arrests in ongoing movement.</p> <p>4 = Can barely perform the task.</p> <table border="1" style="float: right; margin-top: 10px;"> <tr><td style="text-align: center;">R</td><td style="text-align: center;">L</td></tr> </table>                                                                     | R | L |   |   |  |  |
| R                                                                                                                                                                                                                                                                                                                                                           | L                                                                                                                                                                                                                                                                                                                                                                                                                                                                                                                                                                                                                   |   |   |   |   |  |  |

|                                                                                                                                                                                                                                                                                                                                                                                                |                                |                                |                                                                                                                                                                                                                                                                                                                                                                                                                                                                                                          |
|------------------------------------------------------------------------------------------------------------------------------------------------------------------------------------------------------------------------------------------------------------------------------------------------------------------------------------------------------------------------------------------------|--------------------------------|--------------------------------|----------------------------------------------------------------------------------------------------------------------------------------------------------------------------------------------------------------------------------------------------------------------------------------------------------------------------------------------------------------------------------------------------------------------------------------------------------------------------------------------------------|
| <b>Leg Agility</b><br>0 = Normal.<br>1 = Mild slowing and/or reduction in amplitude.<br>2 = Moderately impaired. Definite and early fatiguing.<br>May have occasional arrests in movement.<br>3 = Severely impaired. Frequent hesitation in initiating movements or arrests in ongoing movement.<br>4 = Can barely perform the task.                                                           | <input type="text" value="R"/> | <input type="text" value="L"/> | <b>Postural Stability</b><br><input type="text"/><br>0 = Normal.<br>1 = Retropulsion, but recovers unaided.<br>2 = Absence of postural response; would fall if not caught by examiner.<br>3 = Very unstable, tends to lose balance spontaneously.<br>4 = Unable to stand without assistance.                                                                                                                                                                                                             |
| <b>Arising from Chair</b><br><input type="text"/><br>0 = Normal.<br>1 = Slow; or may need more than one attempt.<br>2 = Pushes self up from arms of seat.<br>3 = Tends to fall back and may have to try more than one time, but can get up without help.<br>4 = Unable to arise without help.                                                                                                  |                                |                                | <b>Body Bradykinesia and Hypokinesia</b><br><input type="text"/><br>0 = None.<br>1 = Minimal slowness, giving movement a deliberate character; could be normal for some persons.<br>Possibly reduced amplitude.<br>2 = Mild degree of slowness and poverty of movement which is definitely abnormal. Alternatively, some reduced amplitude.<br>3 = Moderate slowness, poverty or small amplitude of movement.<br>4 = Marked slowness, poverty or small amplitude of movement                             |
| <b>Posture</b><br><input type="text"/><br>0 = Normal erect.<br>1 = Not quite erect, slightly stooped posture; could be normal for older person.<br>2 = Moderately stooped posture, definitely abnormal; can be slightly leaning to one side.<br>3 = Severely stooped posture with kyphosis; can be moderately leaning to one side.<br>4 = Marked flexion with extreme abnormality of posture.  |                                |                                | <b>Total score</b><br><br><b>UPDRS III</b> <input type="text"/> / 108<br><br><b>Right limbs</b> <input type="text"/> / 36<br><br><b>Left limbs</b> <input type="text"/> / 36                                                                                                                                                                                                                                                                                                                             |
| <b>Gait</b><br><input type="text"/><br>0 = Normal.<br>1 = Walks slowly, may shuffle with short steps, but no festination (hastening steps) or propulsion.<br>2 = Walks with difficulty, but requires little or no assistance; may have some festination, short steps, or propulsion.<br>3 = Severe disturbance of gait, requiring assistance.<br>4 = Cannot walk at all, even with assistance. |                                |                                | <b>Modified Hoehn and Yahr Staging:</b><br><input type="text"/><br>0 = No signs of disease<br>1 = Unilateral disease<br>1.5 = Unilateral plus axial involvement<br>2 = Bilateral disease, no impairment of balance (0/4)<br>2.5 = Bilateral disease, mild, recovery on pull test (1/4)<br>3 = Bilateral disease with some postural instability, physically independent (2/4)<br>4 = Severe disability, still able to walk or stand unassisted (3/4)<br>5 = Wheelchair bound or bed ridden unless unaided |



# แบบสอบถามคุณภาพชีวิต สำหรับโรคพาร์กินสัน (PDQ-8)

จากการป่วยเป็นโรคพาร์กินสัน  
บ่อยแค่ไหนในช่วงหนึ่งเดือนที่ผ่านมาที่คุณ...

กรุณาทำเครื่องหมายเพียงหนึ่งช่อง สำหรับแต่ละคำถาม

|                                                                        | ไม่เคย                   | เป็นบางโอกาส             | เป็นบางเวลา              | บ่อยๆ                    | เสมอๆ หรือ<br>ไม่สามารถทำได้เลย |
|------------------------------------------------------------------------|--------------------------|--------------------------|--------------------------|--------------------------|---------------------------------|
| 1. มีความยากลำบากในการไปไหน<br>มาไหนในที่สาธารณะ?                      | <input type="checkbox"/> | <input type="checkbox"/> | <input type="checkbox"/> | <input type="checkbox"/> | <input type="checkbox"/>        |
| 2. มีความยากลำบากในการแต่งตัว?                                         | <input type="checkbox"/> | <input type="checkbox"/> | <input type="checkbox"/> | <input type="checkbox"/> | <input type="checkbox"/>        |
| 3. รู้สึกเศร้า?                                                        | <input type="checkbox"/> | <input type="checkbox"/> | <input type="checkbox"/> | <input type="checkbox"/> | <input type="checkbox"/>        |
| 4. มีปัญหากับผู้ที่มีความสัมพันธ์<br>ใกล้ชิดกับคุณ?                    | <input type="checkbox"/> | <input type="checkbox"/> | <input type="checkbox"/> | <input type="checkbox"/> | <input type="checkbox"/>        |
| 5. มีปัญหาเกี่ยวกับสมาธิของคุณ เช่น เวลา<br>อ่านหนังสือหรือดูโทรทัศน์? | <input type="checkbox"/> | <input type="checkbox"/> | <input type="checkbox"/> | <input type="checkbox"/> | <input type="checkbox"/>        |
| 6. รู้สึกไม่สามารถสื่อสารกับผู้อื่น<br>ได้อย่างเหมาะสม?                | <input type="checkbox"/> | <input type="checkbox"/> | <input type="checkbox"/> | <input type="checkbox"/> | <input type="checkbox"/>        |
| 7. มีอาการเจ็บปวดจากกล้ามเนื้อ<br>เป็นตะคริวหรือเกร็งตัว?              | <input type="checkbox"/> | <input type="checkbox"/> | <input type="checkbox"/> | <input type="checkbox"/> | <input type="checkbox"/>        |
| 8. รู้สึกอับอายในที่สาธารณะ<br>เนื่องจากเป็นโรคพาร์กินสัน?             | <input type="checkbox"/> | <input type="checkbox"/> | <input type="checkbox"/> | <input type="checkbox"/> | <input type="checkbox"/>        |

กรุณาตรวจทานให้แน่ใจว่าคุณได้เลือกเพียงคำตอบเดียวสำหรับแต่ละข้อ.

ขอขอบคุณที่สละเวลาตอบแบบสอบถาม.

เอกสารแสดงความยินยอมเข้าร่วมโครงการวิจัย

ข้าพเจ้าขอยืนยันว่า ผู้เข้าร่วมโครงการวิจัย  
ได้รับโอกาสในการซักถามและทุกข้อสงสัย  
ได้รับการอธิบายอย่างถูกต้องชัดเจนแล้ว  
ผู้เข้าร่วมโครงการวิจัยยินยอมเข้าร่วม  
โครงการวิจัยด้วยความสมัครใจ

\_\_\_\_\_

ชื่อตัวบรรจงผู้ยินยอมเข้าร่วมโครงการวิจัย

\_\_\_\_\_

ลายเซ็นผู้ยินยอมเข้าร่วมโครงการวิจัย  
วันที่ \_\_\_\_\_

\_\_\_\_\_

ชื่อตัวบรรจงผู้ขอความยินยอมจากผู้เข้าร่วม  
โครงการวิจัย

\_\_\_\_\_

ลายเซ็นผู้ขอความยินยอมจากผู้เข้าร่วม  
โครงการวิจัย  
วันที่ \_\_\_\_\_
